# Supplementary material
Source: PubMed Central journal article supplement (PMC4296167)

Supplemental figure, showing mixed models estimated longitudinal trajectories of multi-morbidity in different baseline age groups (Model I Table 2)

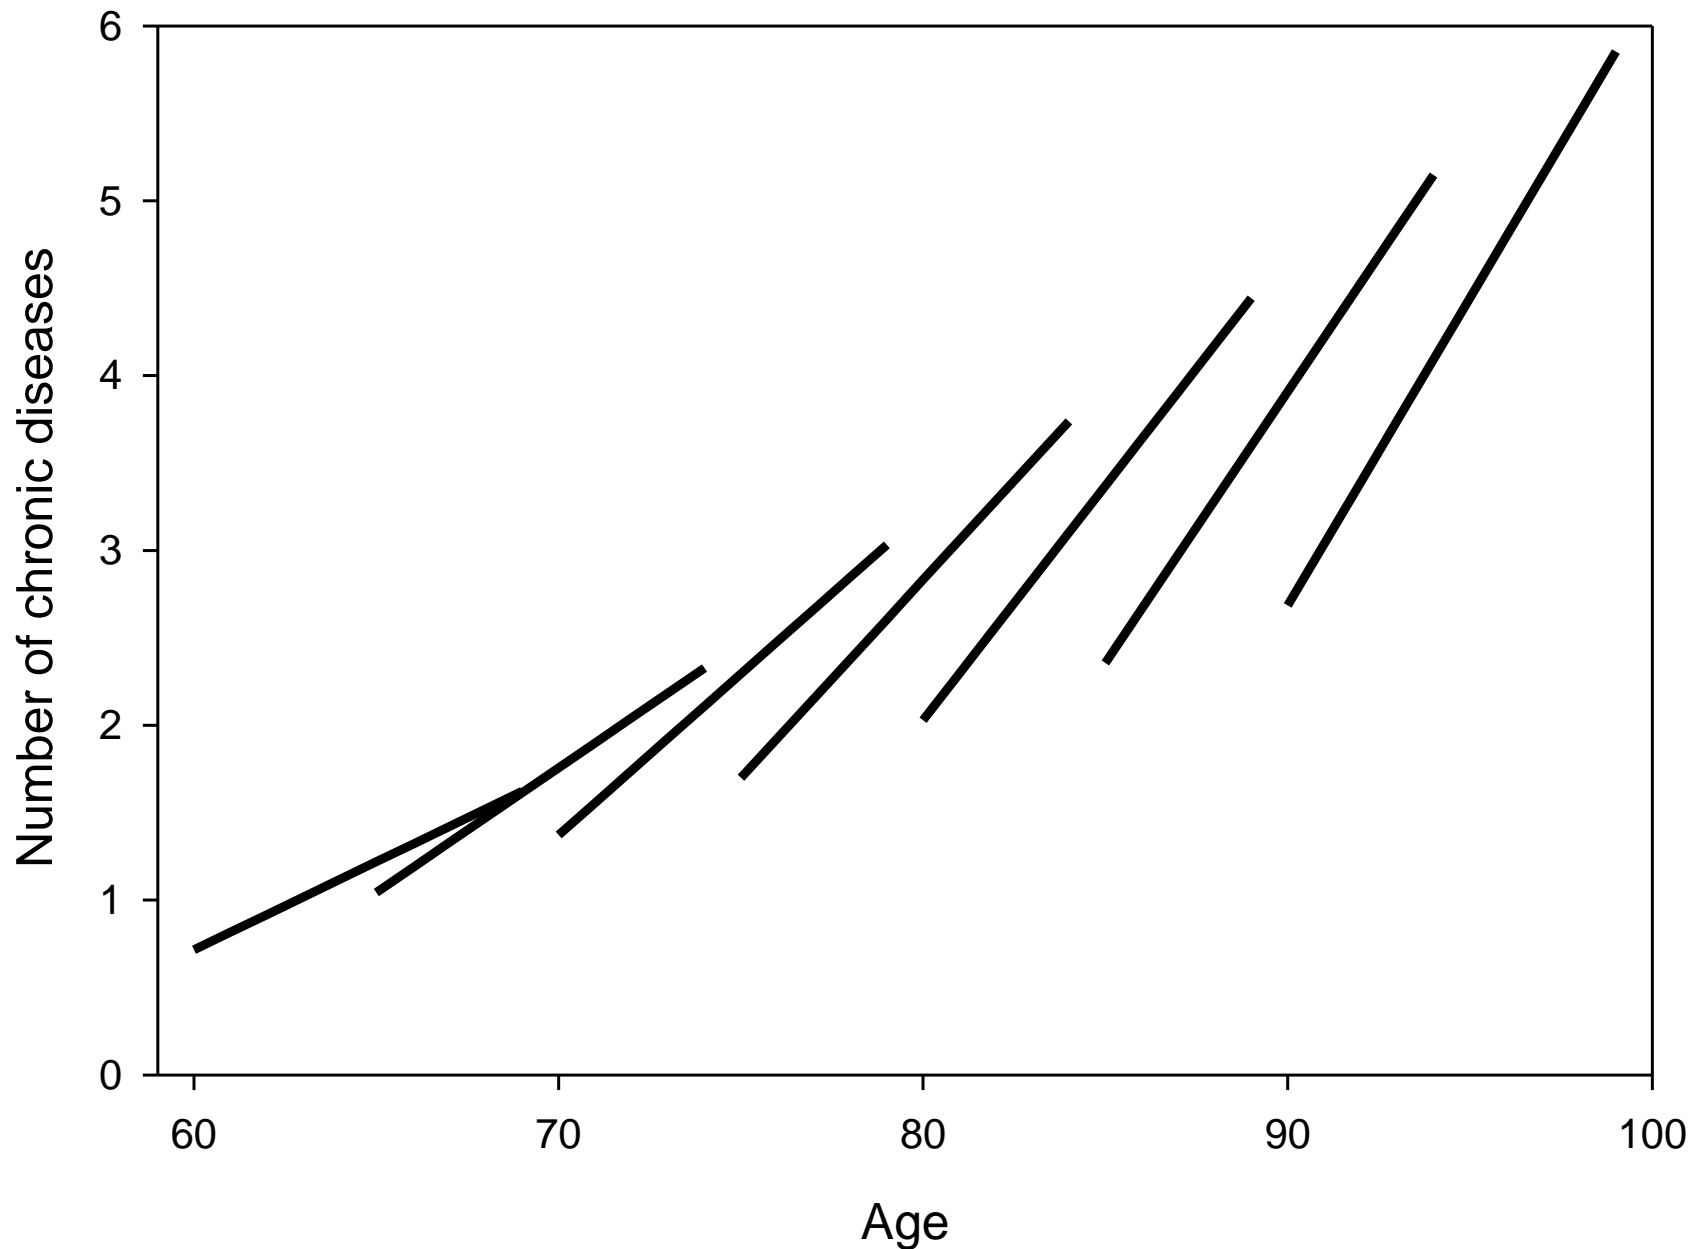

Supplement: supp_glu127_Supplemental_figure1.pdf [file supp_glu127_Supplemental_figure1.pdf]
